# Supplementary material
Source: Springer Nature journal article supplement (https://www.springermedizin.de/resource/supplementary/12933_2012_582_MOESM2_ESM.pdf/9538524)
Supplement: MOESM2 [file 9538524]

|                         | Non-diabetic controls                    | 1 <sup>st</sup> HbA <sub>1c</sub> quintile                           | 2 <sup>nd</sup> HbA <sub>1c</sub> quintile                     | 3 <sup>rd</sup> HbA <sub>1c</sub> quintile                     | 4 <sup>th</sup> HbA <sub>1c</sub> quintile                     | 5 <sup>th</sup> HbA <sub>1c</sub> quintile                             |
|-------------------------|------------------------------------------|----------------------------------------------------------------------|----------------------------------------------------------------|----------------------------------------------------------------|----------------------------------------------------------------|------------------------------------------------------------------------|
| Hyperinsulinemia/<br>IR | BMI 0.704<br>Insulin 0.793<br>HDL -0.487 | BMI 0.452<br>Insulin dose 0.767<br>Triglycerides 0.507<br>HDL -0.621 | Triglycerides 0.645<br>Insulin dose 0.724<br>HDL -0.714        | BMI 0.499<br>Insulin dose 0.811<br>HDL -0.602                  | Insulin dose 0.810<br>HDL -0.577                               | BMI -0.677<br>Triglycerides -0.528<br>Insulin dose -0.663<br>HDL 0.573 |
| Body size/<br>Time      | Age 0.826<br>BMI 0.528<br>MBP 0.732      | Age 0.819<br>BMI 0.579<br>Diabetes duration 0.788<br>MBP 0.644       | Age 0.858<br>BMI 0.536<br>Diabetes duration 0.767<br>MBP 0.630 | Age 0.835<br>BMI 0.567<br>Diabetes duration 0.785<br>MBP 0.592 | Age 0.795<br>BMI 0.674<br>Diabetes duration 0.770<br>MBP 0.569 | Age 0.861<br>BMI 0.464<br>Diabetes duration 0.681<br>MBP 0.676         |
| Glucose<br>metabolism   | A1C 0.785<br>Triglycerides -0.650        | A1C 0.858<br>Triglycerides -0.466                                    | A1C 0.852<br>BMI 0.490                                         | A1C 0.743<br>HDL 0.437<br>Triglycerides 0.498                  | A1C 0.791<br>Triglycerides 0.669                               | A1C 0.882                                                              |
